# Supplementary material for: Mg-doped Ta3N5nanorods coated with a conformal CoOOH layer for water oxidation: bulk and surface dual modification of photoanodes
Source: Royal Society of Chemistry journal article supplement (doi:10.1039/c7ta06227c), 2017-01-01
Supplement: c7ta06227c1.pdf [file c7ta06227c1.pdf]

## Supporting Information

### **Mg-doped Ta<sub>3</sub>N<sub>5</sub> nanorod coated with a conformal CoOOH layer for water oxidation : bulk and surface dual modification of photoanodes**

Lang Pei<sup>a</sup>, Zhe Xu<sup>a</sup>, Zhan Shi<sup>b</sup>, Heng Zhu<sup>a</sup>, Shicheng Yan<sup>a,\*</sup>, Zhigang Zou<sup>a,b</sup>

<sup>a</sup>Eco-materials and Renewable Energy Research Center (ERERC), Collaborative Innovation Center of Advanced Microstructures, College of Engineering and Applied Sciences, Nanjing University, No. 22 Hankou Road, Nanjing, Jiangsu 210093, P. R. China

<sup>b</sup>Jiangsu Key Laboratory for Nano Technology, National Laboratory of Solid State Microstructures, Department of Physics, Nanjing University, No. 22 Hankou Road, Nanjing, Jiangsu 210093, P. R. China.

#### **Corresponding Author**

\*E-mail: Shicheng Yan: [yscfei@nju.edu.cn](mailto:yscfei@nju.edu.cn) (S. Yan)

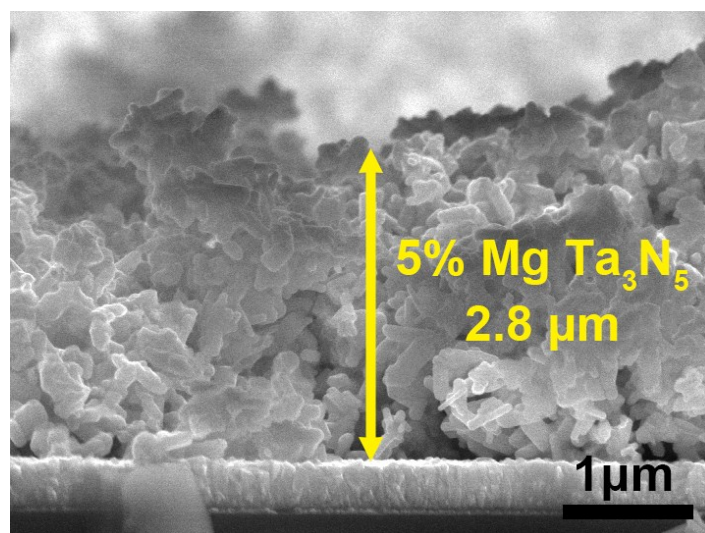

**Fig. S1** Cross-sectional SEM image for 5% Mg-Ta<sub>3</sub>N<sub>5</sub> nanorods photoanode.

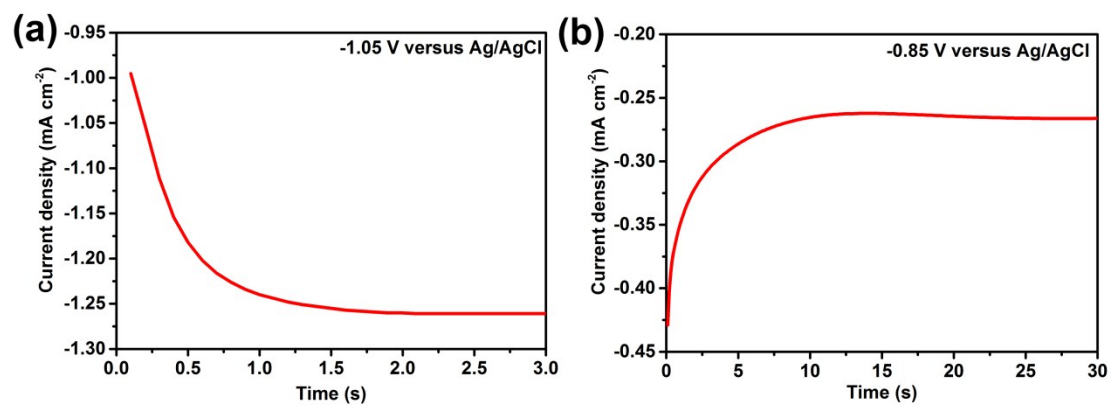

**Fig. S2** Current-time curves, registered during the two-step potentiostatic electrodeposition of Co(OH)<sub>2</sub> on as-prepared electrodes. (a) Nucleation step and (b) slower growth step. The electrodeposition was performed in a 0.01M cobalt (II) nitrate hexahydrate solution, at pH 5.5 and T =273K.

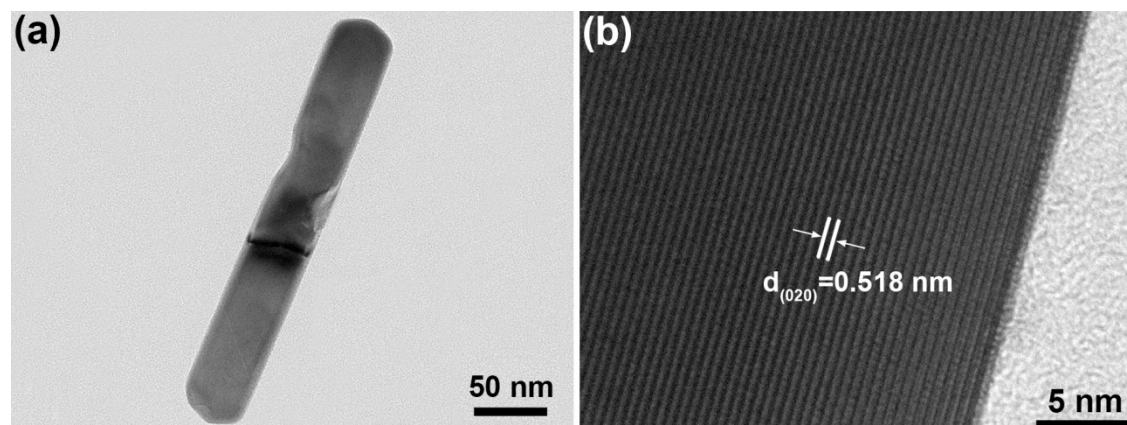

**Fig. S3** (a) TEM and (b) HRTEM images for pure Ta<sub>3</sub>N<sub>5</sub> nanorod.

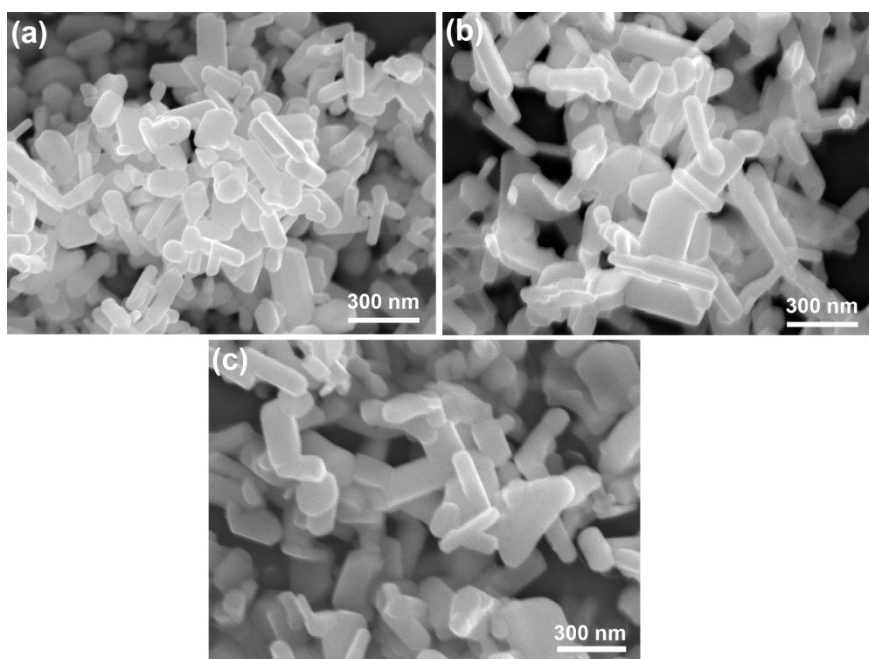

**Fig. S4** SEM images for (a) pure Ta<sub>3</sub>N<sub>5</sub>, (b) 3% Mg-Ta<sub>3</sub>N<sub>5</sub> and (c) 10% Mg-Ta<sub>3</sub>N<sub>5</sub> nanorods.

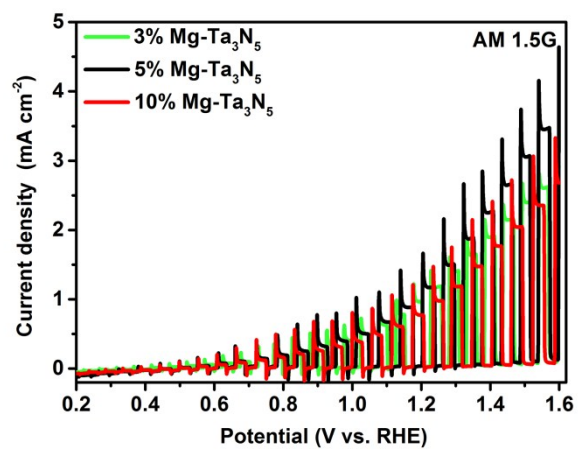

**Fig. S5** Current-potential curves for 3% Mg-Ta<sub>3</sub>N<sub>5</sub>, 5% Mg-Ta<sub>3</sub>N<sub>5</sub> and 10% Mg-Ta<sub>3</sub>N<sub>5</sub> photoanodes under AM 1.5G simulated sunlight (100 mW cm<sup>-2</sup>) in 1 M NaOH aqueous solution (pH 13.6).

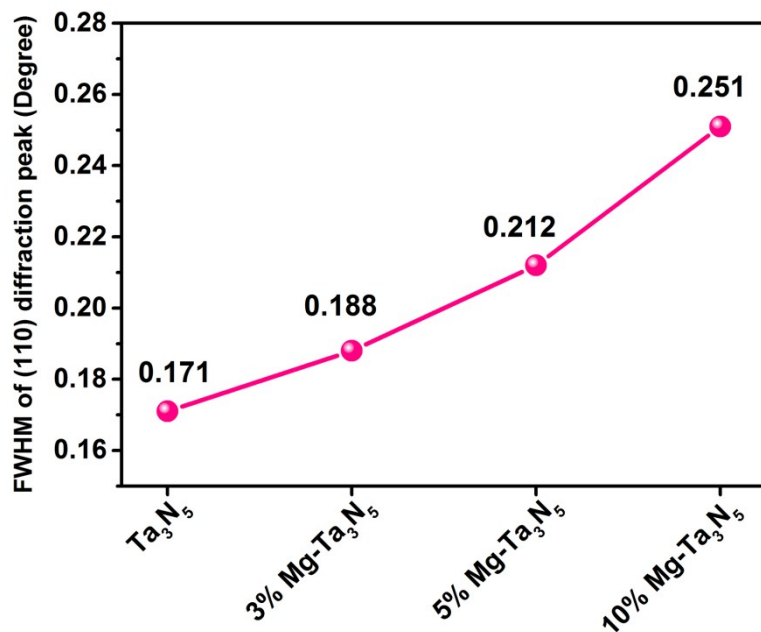

**Fig. S6** The FWHM of the (110) diffraction peak for Ta<sub>3</sub>N<sub>5</sub> and Mg-Ta<sub>3</sub>N<sub>5</sub>.

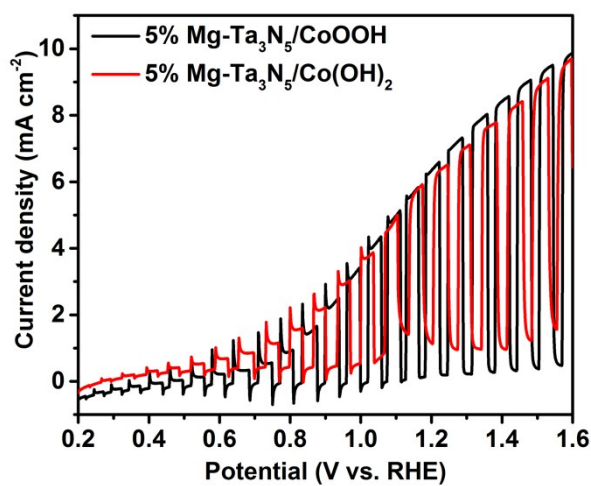

**Fig. S7** Current-potential curves of 5% Mg-Ta<sub>3</sub>N<sub>5</sub>/CoOOH (10s) and 5% Mg-Ta<sub>3</sub>N<sub>5</sub>/Co(OH)<sub>2</sub> (10s) photoanodes in 1 M NaOH aqueous solution (pH 13.6) under AM 1.5G simulated sunlight (100 mW cm<sup>-2</sup>) illumination.

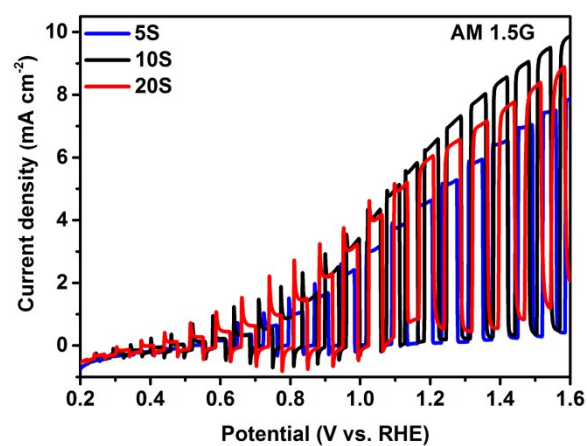

**Fig. S8** Current-potential curves for 5% Mg-Ta<sub>3</sub>N<sub>5</sub> photoanodes coated with CoOOH for 5, 10 and 20s under AM 1.5G simulated sunlight (100 mW cm<sup>-2</sup>) in 1 M NaOH aqueous solution (pH 13.6).

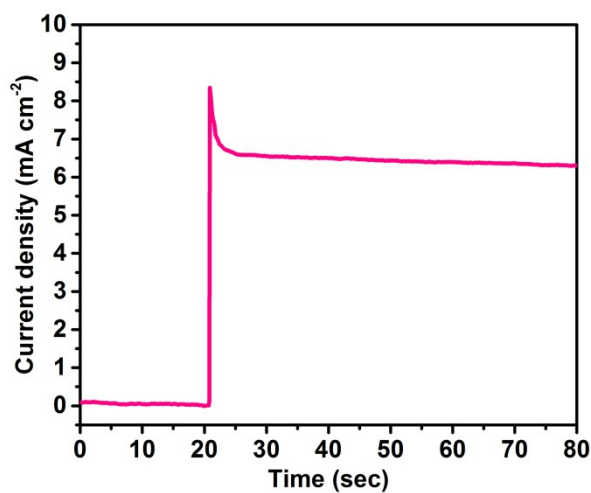

**Fig. S9** The steady-state photocurrent of 5% Mg-Ta<sub>3</sub>N<sub>5</sub>/CoOOH (10s) photoanode in 1 M NaOH aqueous solution (pH 13.6) under AM 1.5G simulated sunlight (100 mW cm<sup>-2</sup>) illumination at 1.23 V<sub>RHE</sub>.

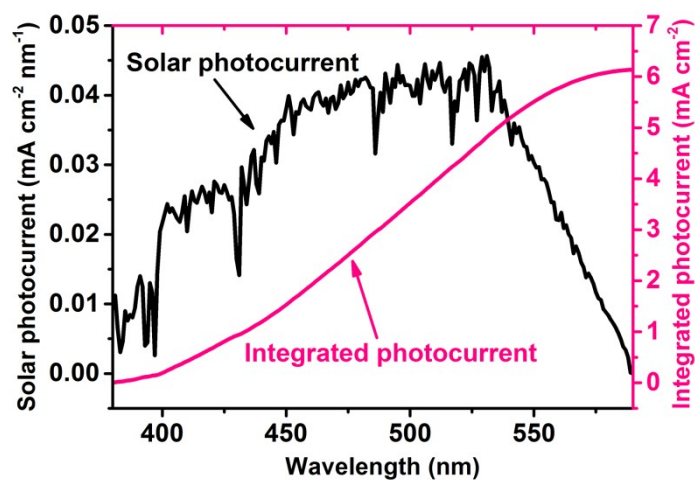

**Fig. S10** Solar photocurrent spectrum (black) of the 5% Mg-Ta<sub>3</sub>N<sub>5</sub>/CoOOH (10s) photoanode at 1.23 V<sub>RHE</sub> obtained by multiplication of its IPCE spectrum with the photon flux spectrum of global sunlight (100 mW/cm<sup>2</sup> AM 1.5G). Integrated photocurrent under global sunlight between 380 nm and 590 nm (pink).
